# Supplementary material for: Kinetics of Immune Subsets in COVID-19 Patients Treated with Corticosteroids
Source: MDPI journal article supplement (doi:10.3390/v15010051), 2022-12-24
Supplement: s1 [file s1]

**Table S1.** Laboratory findings of patients on admission. Quantitative variables with normal distribution are presented as mean ( $\pm$  sem). Quantitative variables with non-Gaussian distribution are presented as median (inter-quartile range-IQR). Qualitative variables are presented as numbers. DXM: Dexamethasone, WBC: White Blood Cell count, Hct: Hematocrit, HgB: Hemoglobin, PT: Prothrombin Time, aPTT: activated Partial Thromboplastin Time, INR: International Normalized Ratio, ESR: Erythrocyte Sedimentation Rate, AST: Aspartate Transaminase, ALT: Alanine Transaminase, LDH: Lactate Dehydrogenase, CRP: C-reactive protein, CPK: Creatine Phosphokinase. *p*-values  $<0.05$  were considered significant. \**p* $<0.05$  to DXM failure, #*p* $<0.05$  to DXM success.

|                          | No DXM                 | DXM success          | DXM failure           |
|--------------------------|------------------------|----------------------|-----------------------|
| WBC/ $\mu$ L             | 4940 (4205–6315)*      | 5310 (3933–6638)*    | 7530 (5058–10720)     |
| Platelets X1000/ $\mu$ L | 172.5 (144.75–217.75)  | 189.5 (153–219.75)   | 148.5 (117.25–232.75) |
| Hct (%)                  | 39.2 (35.98–41.23)     | 37.75 (34.78–40.2)   | 39.75 (36.2–42.5)     |
| HgB g/dL                 | 12.75 $\pm$ 0.2928     | 12.49 $\pm$ 0.1921   | 13.08 $\pm$ 0.5845    |
| PT sec                   | 12.45 (11.8–13.13)*    | 12.7 (12.1–13.2)*    | 14.1 (12.88–15.68)    |
| aPTT sec                 | 29.9 (27.68–33.25)*, # | 32.85 (29.58–37.18)  | 34.85 (32–46.1)       |
| INR                      | 1.03 (0.975–1.075)*    | 1.03 (0.9825–1.093)* | 1.16 (1.068–1.263)    |
| D-Dimers $\mu$ g/mL      | 0.6 (0.47–1.03)        | 0.72 (0.49–1.06)     | 0.87 (0.52–1.64)      |
| Ferritin ng/mL           | 232 (70.1–403.6)       | 301.7 (156.9–515.2)  | 382.4 (233.1–968.9)   |
| ESR mm/h                 | 37 (26–46.5)           | 49 (33–58)           | 30 (12–56)            |
| Urea mg/dL               | 29 (22.75–33.5)*       | 24.5 (20.25–34)*     | 40.5 (34–61.5)        |
| Creatinine mg/dL         | 0.8 (0.7–1)*           | 0.8 (0.7–0.9)*       | 1.15 (0.9–1.35)       |
| Na <sup>+</sup> mmol/L   | 139 (136–141.3)        | 137 (134–140)        | 138.5 (137.3–139)     |
| K <sup>+</sup> mmol/L    | 4.2 (3.9–4.42)         | 4.1 (3.8–4.27)       | 4.15 (3.8–4.47)       |
| AST IU/L                 | 28 (17–42.25)          | 35 (26–45.75)        | 33.5 (21.25–78.25)    |
| ALT IU/L                 | 22.5 (16.75–37)        | 31.5 (18–44.5)       | 23.5 (19.25–77.75)    |
| Billirubin mg/dL         | 0.38 (0.2775–0.585)*   | 0.41 (0.31–0.5175)*  | 0.76 (0.4525–1.043)   |
| LDH IU/L                 | 245 (190–302.3)*, #    | 320 (248.3–416.5)    | 365.5 (247.8–539)     |
| CRP mg/dL                | 2.25 (1.27–5.37)*, #   | 7.35 (3.7–12.75)     | 11.35 (2.8–16.58)     |
| CPK IU/L                 | 89.5 (60.25–162)*      | 133 (58.75–254)      | 453 (91–890.8)        |
| Troponine pg/mL          | 6 (4–10)*              | 7 (5–12.75)          | 14.5 (6.75–39.5)      |
| Lactate mmol/L           | 0.9 (0.7–1)*           | 0.9 (0.8–1.2)        | 1.1 (0.9–2.5)         |

**Table S2.** Days of samples' acquisition. Values are presented as median (inter-quartile range-IQR). DXM: dexamethasone. *p*-values < 0.001 were considered significant. \*: *p*<0.001 to no DXM.

|                         | No DXM      | DXM success   | DXM failure       |
|-------------------------|-------------|---------------|-------------------|
| <b>1st Sample</b>       |             |               |                   |
| Days from admission     | 2 (1–3)     | 2 (2–2.75)    | 1 (1–2)           |
| Days from symptom onset | 9 (6–11)    | 9 (7–11)      | 9 (6.5–9.75)      |
| <b>2nd Sample</b>       |             |               |                   |
| Days from admission     | 5 (4.5–5.5) | 8 (7–10.5) *  | 11 (9.5–11)*      |
| Days from symptom onset | 12 (9–13)   | 15 (13.5–18)* | 17 (16.25–18.75)* |
